# Supplementary material
Source: PubMed Central journal article supplement (PMC166365)

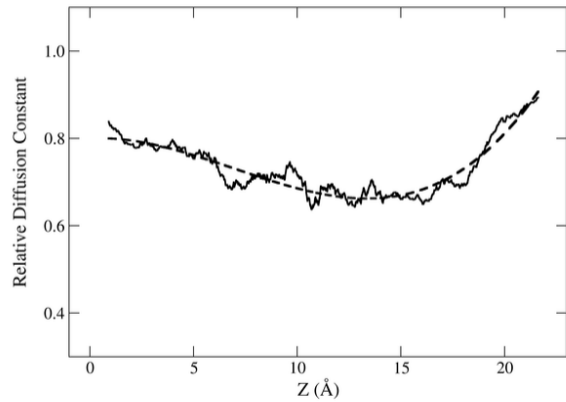

Supplement: pnas_1431750100_3.pdf [file pnas_1431750100_3.pdf]
